# Supplementary material for: Sources of erroneous sequences and artifact chimeric reads in next generation sequencing of genomic DNA from formalin-fixed paraffin-embedded samples
Source: PubMed Central journal article supplement — Nucleic Acids Res. 2018 Nov 12;47(2):e12. doi: 10.1093/nar/gky1142 (PMC6344851; doi:10.1093/nar/gky1142), 2018-11-12
Supplement: gky1142_supplemental_files.pdf [file gky1142_supplemental_files.pdf]

# PCR-free library construction

## Materials and Equipment

| Name                                                    | Supplier              | Number: #       | Model or Catalogue # |     |
|---------------------------------------------------------|-----------------------|-----------------|----------------------|-----|
| NEB Paired-End Sample Prep Premix Kit – End Repair      | NEB                   | E6875B-GSC      |                      | ✓   |
| NEB Paired-End Sample Prep Premix Kit – A Tail          | NEB                   | E6876B-GSC      |                      | ✓   |
| NEB Paired-End Sample Prep Premix Kit – Ligation        | NEB                   | E6877B-GSC      |                      | ✓   |
| Fisherbrand Textured Nitrile gloves – various sizes     | Fisher                | 270-058-53      |                      | ✓   |
| dNTPs, 10 mM each                                       | Invitrogen            | 46-0519         |                      | ✓   |
| Ice bucket                                              | Fisher                | 11-676-36       |                      | ✓   |
| Covaris LE220 with WCS and Chiller                      | Covaris               | LE220           | ✓                    |     |
| DNA AWAY                                                | Molecular BioProducts | 21-236-28       |                      | ✓   |
| Gilson P2 pipetman                                      | Mandel                | GF-44801        | ✓                    |     |
| Gilson P10 pipetman                                     | Mandel                | GF-44802        | ✓                    |     |
| Gilson P20 pipetman                                     | Mandel                | GF23600         | ✓                    |     |
| Gilson P200 pipetman                                    | Mandel                | GF-23601        | ✓                    |     |
| Gilson P1000 pipetman                                   | Mandel                | GF-23602        | ✓                    |     |
| Diamond Filter tips DFL10                               | Mandel Scientific     | GF -F171203     |                      | ✓   |
| Diamond Filter tips DF30                                | Mandel Scientific     | GF-F171303      |                      | ✓   |
| Diamond Filter tips DF200                               | Mandel Scientific     | GF-F171503      |                      | ✓   |
| Diamond Filter tips DF1000                              | Mandel Scientific     | GF-F171703      |                      | ✓   |
| Galaxy mini-centrifuge                                  | VWR                   | 37000-700       | ✓                    |     |
| VX-100 Vortex Mixer                                     | Rose Scientific       | S-0100          | ✓                    |     |
| Black ink permanent marker pen                          | VWR                   | 52877-310       |                      | ✓   |
| Clear Tape Sealer                                       | Qiagen                | 19570           |                      | ✓   |
| Aluminum Foils seals                                    | VWR                   | 60941-126       |                      | ✓   |
| Aluminum foil tape, 3"x 60 yds                          | Scotch/3M             | 34000740        |                      | ✓   |
| Eppendorf BenchTop Refrigerated Centrifuge 5810R        | Eppendorf             | 5810 R          | ✓                    |     |
| Bench Coat (Bench Protection Paper)                     | Fisher                | 12-007-186      |                      | ✓   |
| Small Autoclave waste bags 10"X15"                      | Fisher                | 01-826-4        |                      | ✓   |
| Anhydrous Ethyl Alcohol (100% Ethanol)                  | CommercialAlcohols    | 00023878        |                      | ✓   |
| IKA Works Vortexer                                      | Agilent               | MS2S9-5065-4428 | ✓                    |     |
| 22R Microfuge Centrifuge                                | Beckman               | 22R Centrifuge  | ✓                    |     |
| Peltier Thermal Cycler                                  | MJ Research           | PTC-225         | ✓                    |     |
| Power Supply, LVC2kW, 48VDCV                            | Tyco Electronics      | RM200HA100      | ✓                    |     |
| Plate, 96-Well reservoirs, diamond-bottom, Low-Profile  | Seahorse              | EK2036          |                      | ✓   |
| AB1000 96-well 200µl PCR plate                          | Fisher                | AB1000          |                      | ✓   |
| MagMax express 96 Deep Well plates (EtOH and waste)     | Applied Biosystems    | 4388476         |                      | ✓   |
| Storage Plate, 96-well, 1.2 mL, square well, U-bottomed | ABgene                | AB1127          |                      | ✓   |
| Microlab NIMBUS                                         | NIMBUS                | Hamilton        | ✓                    |     |
| Eppendorf Benchtop Centrifuge                           | Eppendorf             | 5810 R          | ✓                    |     |
| 70% Ethanol                                             | In house              | N/A             | N/A                  | N/A |
| Qiagen Buffer EB – 250 mL                               | Qiagen                | 19086           |                      | ✓   |
| UltraPure Distilled Water                               | Invitrogen            | 10977-023       |                      | ✓   |
| Nuclease Free 2.0 mL eppendorf tube                     | Ambion                | 12400           |                      | ✓   |
| 5 mL Screw Cap tubes                                    | Ultident              | SCT-5ML-S       |                      | ✓   |
| TruSeq Indexed Adapters                                 | IDT                   | NA              |                      |     |
| TruSeq Universal Primers                                | IDT                   | NA              |                      |     |
| Alpaqua Magnum FLX                                      | Alpaqua Engineering   | A000400         | ✓                    |     |
| Ampure XP Beads, 450mL                                  | Agencourt             | A63882          |                      | ✓   |
| PCR Clean DX (ALINE beads)                              | ALINE Biosciences     | C-1003-450      |                      | ✓   |
| NIMBUS P50 tips 50uL Clear Sterile Tips, 5760 tips/case | Hamilton Co.          | 235831          |                      | ✓   |



| Supernatant Volume (μL) | Bead Volume (μL) | Mixing Volume (μL) | Bead Binding Time (mins) | Magnet Clearing Time (mins) | Ethanol Air Dry Time (mins) | EB Elution Volume (μL) | Elution Time (mins) | Magnet Elution Time (mins) | Transfer Volume (μL) |
|-------------------------|------------------|--------------------|--------------------------|-----------------------------|-----------------------------|------------------------|---------------------|----------------------------|----------------------|
| 150                     | 25               | 140                | 15                       | 7                           | 5                           | 32                     | 3                   | 2                          | 30                   |

3.2. Note: This is a safe stopping point. Do not proceed to adenylation unless you have adequate time to perform ligation reaction as well.

#### 4. A-Tailing

| Solution               | 1 rxn (μL) |
|------------------------|------------|
| End-Repair + BC DNA    | 30         |
| NEB Adenylation Premix | 20         |
| <b>Reaction volume</b> | <b>50</b>  |

4.1. Transfer 20 μL of NEB Adenylation Premix to 30 μL of size selected and repaired/phosphorylated DNA.

4.2. Tetrad Program: LIBCOR>ATAIL-37°C for 30 minutes; 70°C for 5 minutes; 4°C for 5 minutes; 4°C hold.

4.3. Proceed directly to in-tandem ligation (**do not bead clean after Adenylation**). Store on ice while preparing Ligation premix and adapters.

#### 5. Adapter Ligation

| Solution                   | 1 rxn (μL) |
|----------------------------|------------|
| <b>Adenylated template</b> | <b>50</b>  |
| <b>NEB Ultra Premix 2X</b> | 21         |
| TruSeq Adapter, 6.25uM     | 4          |
| <b>Reaction volume</b>     | <b>75</b>  |

5.1. Transfer Template to single use adapter plate containing 4uL of TruSeq adapter per well.

5.2. Transfer 21μL of ligation brew to 54 μL of template plus index adapter.

5.3. Reset pipette to 80% total volume, mix 10X.

5.4. Select tetrad program: LIBCOR>LIGATION- 20<sup>0</sup>C for 15 minutes: hold 4°C

5.5. Set a timer for 15 minutes. Quick spin plate and store on ice immediately after the 15 minute ligation.

## 6. Double Bead Clean post Ligation (1:1)

### Bead clean #1

| DNA volume (µL) | Bead Volume (µL) | Mixing Volume (µL) | Bead Binding Time (mins) | Magnet Clearing Time (mins) | 2x 70% EtOH Wash Vol (µL) | Ethanol Air Dry Time (mins) | EB Elution Volume (µL) | Elution Time (mins) | Magnet Elution Time (mins) | Transfer Volume (µL) |
|-----------------|------------------|--------------------|--------------------------|-----------------------------|---------------------------|-----------------------------|------------------------|---------------------|----------------------------|----------------------|
| 75              | 75               | 120                | 15                       | 7                           | 150                       | 5                           | 52                     | 3                   | 2                          | 50                   |

### Bead clean #2

| DNA volume (µL) | Bead Volume (µL) | Mixing Volume (µL) | Bead Binding Time (mins) | Magnet Clearing Time (mins) | 2x 70% EtOH Wash Vol (µL) | Ethanol Air Dry Time (mins) | EB Elution Volume (µL) | Elution Time (mins) | Magnet Elution Time (mins) | Transfer Volume (µL) |
|-----------------|------------------|--------------------|--------------------------|-----------------------------|---------------------------|-----------------------------|------------------------|---------------------|----------------------------|----------------------|
| 50              | 50               | 80                 | 15                       | 7                           | 150                       | 5                           | 20                     | 3                   | 2                          | 19                   |

6.1. The ligated template can be stored at -20°C after the first or second bead clean up step.

## 7. qPCR.

Libraries were quantified using the KAPA Library Quantification kit.

## Supplementary Figure Legends

**Supplementary Figure 1. Majority of SSARs involve non-contiguous sequences that map within 500 bases from each other.** SSARs were identified by searching for reads whose alignments to the reference genome were broken into two or more disparate segments with at least two segments aligning 1) on opposite strands and 2) within a pre-defined maximum distance of each other. The SSAR artifacts were identified as the subset of these multiple strand split reads whose segments align within the indicated gaps in bp of each other (Y-axis). From here, it can be observed that a distance threshold of 500 bp allows the detection of ~80% of SSARs.

**Supplementary Figure 2. Levels of SSAR and unpaired reads are largely non-overlapping.** SSAR levels are shown as percentages of total number of all aligned reads, total number of properly paired (PP) reads and total number of improperly paired reads.

**Supplementary Figures 3-7. Effect of extraction protocols on FFPE library quality.** Data from indicated metrics were plotted for libraries that were derived from fresh-frozen DNA (FF), for libraries that were prepared from nucleic acid that was extracted using the FormaPure protocol (FFPE F) and the Allprep/HighPure protocol (FFPE A-H).

**Supplementary Figures 8. Differences between the the FormaPure (FFPE F) and the Allprep/HighPure (FFPE A-H) extraction protocols.** Note that the FormaPure protocol includes longer incubations at higher temperature and is magnetic bead-based (as opposed to the column-based A-H protocol).

**Supplementary Figure 9. Measures to improve FFPE library quality and their effects on the levels of paired-end reads, chimeric reads and base error rates.** Mouse FFPE scrolls were used as starting materials. 100 ng TNA that was extracted using the FormaPure protocol was used (F). 100 ng DNA that was extracted using the Qiagen/HiPure protocol was used with (A-H). Additional input conditions included FormaPure extracted DNA that was stringently size selected (F+ Stringent SS) using 0.7:1 (beads to sheared nucleic acid ratio) as opposed to standard size selection with 1:1 beads to sheared nucleic acid as well as FormaPure extracted nucleic acid that was treated with S1 nuclease (F+S1). Error bars=Standard deviations.

**Supplementary Figure 10. Effects of S1 nuclease treatment on the levels of duplicate rates.** . 100 and/or 300 ng TNA extracted using the FormaPure protocol was used with (F+S1) or without (F) S1 nuclease treatment. 100 ng DNA extracted using the Qiagen/HiPure protocol was used with (A-H+S1) or without (A-H-S1) S1 nuclease treatment. N=5 (FFPE samples from 5 patients). Of note, these samples were not patient-matched between the extraction protocols (A-H and F). Error bars=Standard deviations.

**Supplementary Figure 11. Effects of S1 nuclease treatment on deep sequencing metrics.** Various metrics are shown for libraries that were prepared from fresh normal and tumor samples, and matching FormaPure FFPE samples with (F+S1) or without (F-S1) S1 nuclease treatment.

**Supplementary Figure 12. Comparisons of single nucleotide variant allelic frequencies (VAFs).** Libraries that are being compared are from fresh-frozen (FF) tumor samples, and matching FormaPure FFPE tumor samples with (F+S1) or without (F-S1) S1 nuclease treatment. Single nucleotide VAFs shown with a QSS score  $\geq 15$  (left panel) and QSS score  $\geq 35$  (right panel).

**Supplementary Figure 13. Effects of S1 nuclease treatment on FFPE-associated single base INDELS.** Libraries were prepared from fresh normal and tumor samples from the same patient, and matching FormaPure FFPE samples with (F+S1) and or without (F-S1) S1 nuclease treatment. For each of the three latter libraries, INDELS were identified relative to the library from the normal blood sample and a Venn diagram representing the resulting data is shown.

**Supplementary Figure 14-16. Effects of S1 nuclease treatment on FFPE-associated copy number variants (CNVs).** Libraries were prepared from fresh normal and tumor samples from the same patient, and matching FormaPure FFPE samples with (F+S1) and or without (F-S1) S1 nuclease treatment. For each of the three latter libraries, CNVs were identified relative to the library from the normal blood sample and a Venn diagram representing the resulting data is shown. CNV segments in a bin size of 200 reads were calculated in the tumor samples relative to the normal blood sample and the resulting profiles are shown for all chromosomes in Supplementary Figure 14 (Fresh-frozen), Supplementary Figure 15 (FFPE -S1), and Supplementary Figure 16 (FFPE +S1).

**Supplementary Figure 17. Comparison of S1 nuclease treatment of FormaPure extracted nucleic acid with DNA extracted Qiagen/HiPure protocol (Q-H).** Data from F+S1 was compared to a range of data obtained for libraries that were prepared from DNA that was extracted using the Qiagen/HiPure protocol (Q-H) for the indicated metrics.

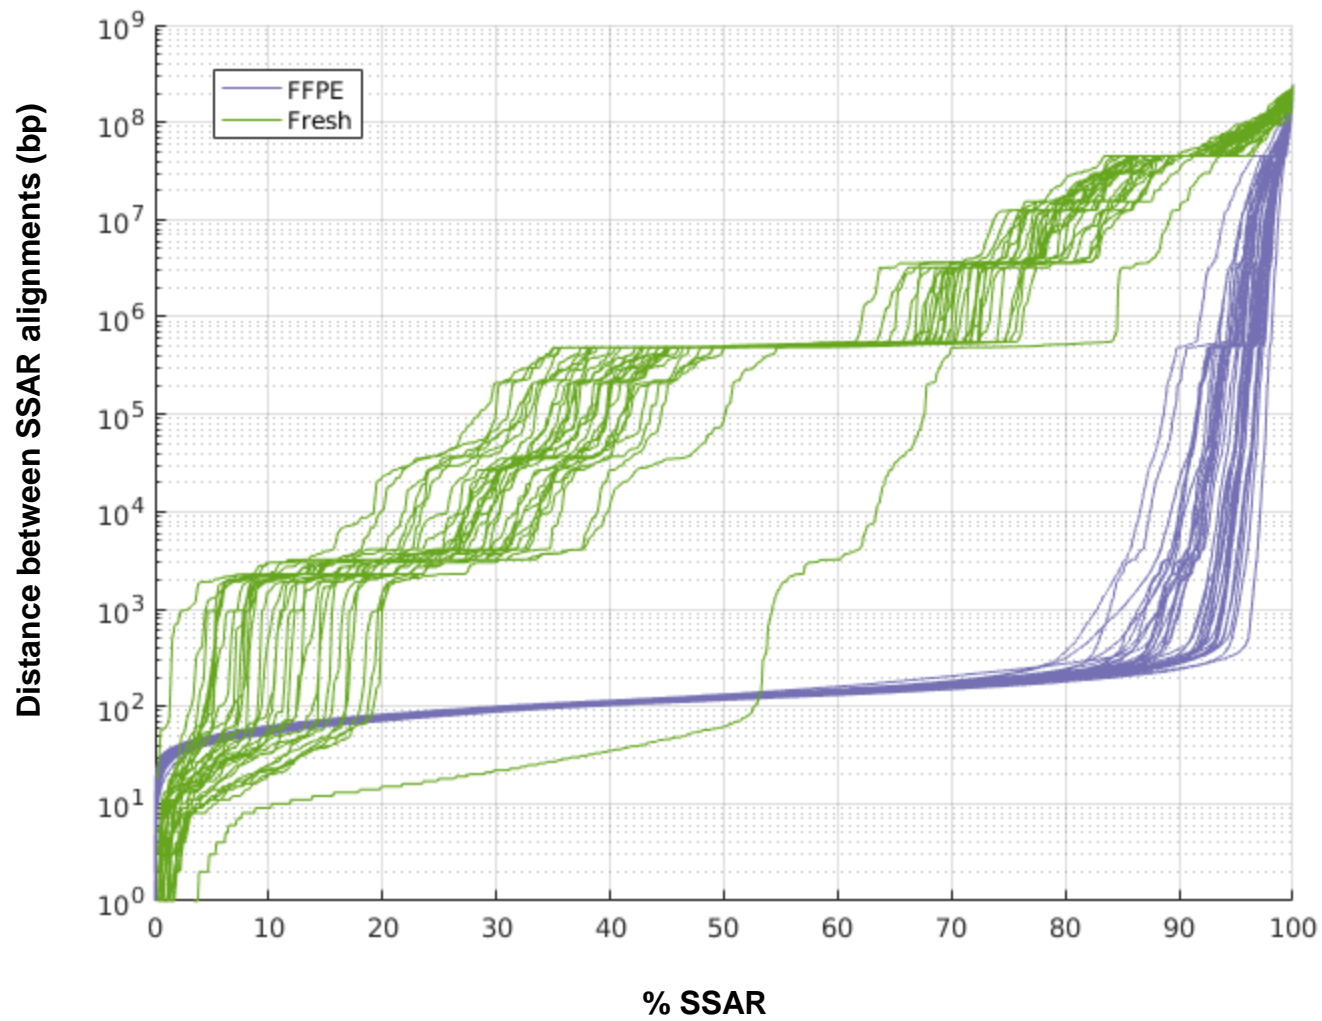

Supplementary Figure 1

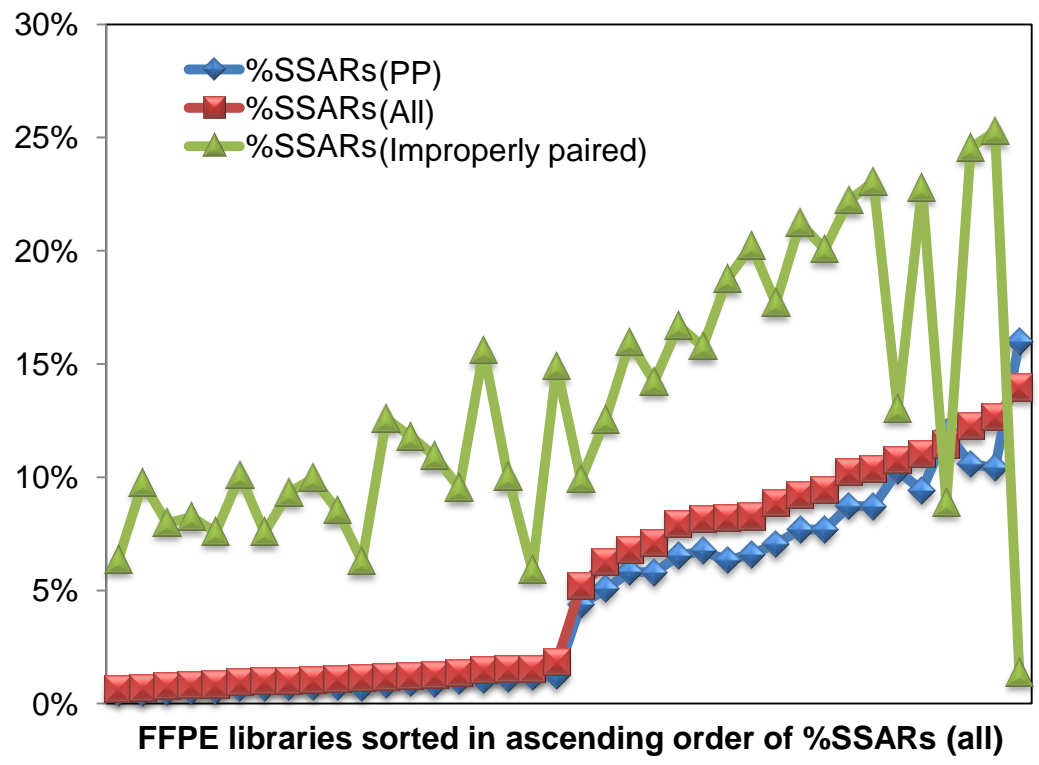

Supplementary Figure 2



**A.**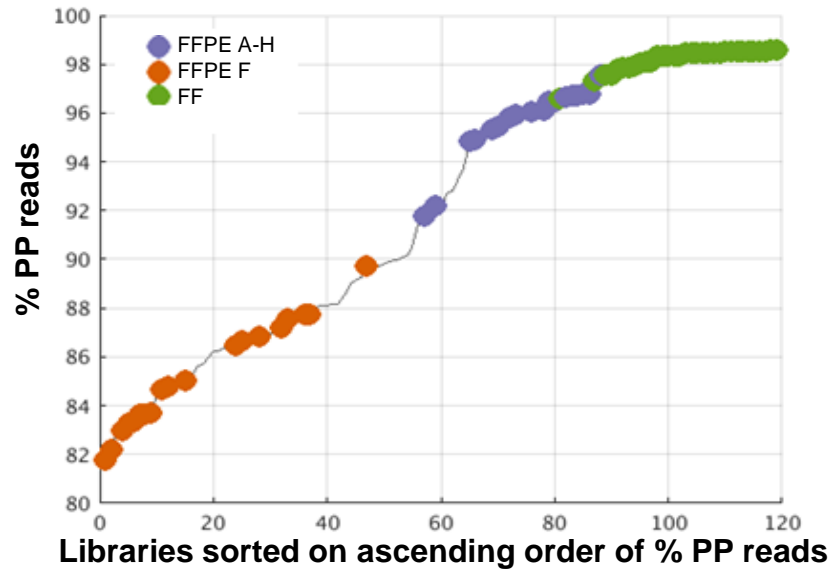**B.**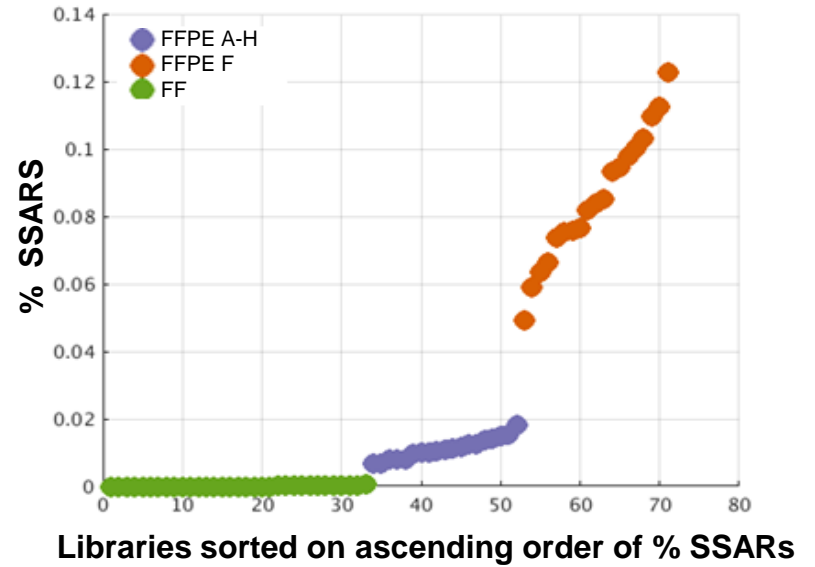

**A.**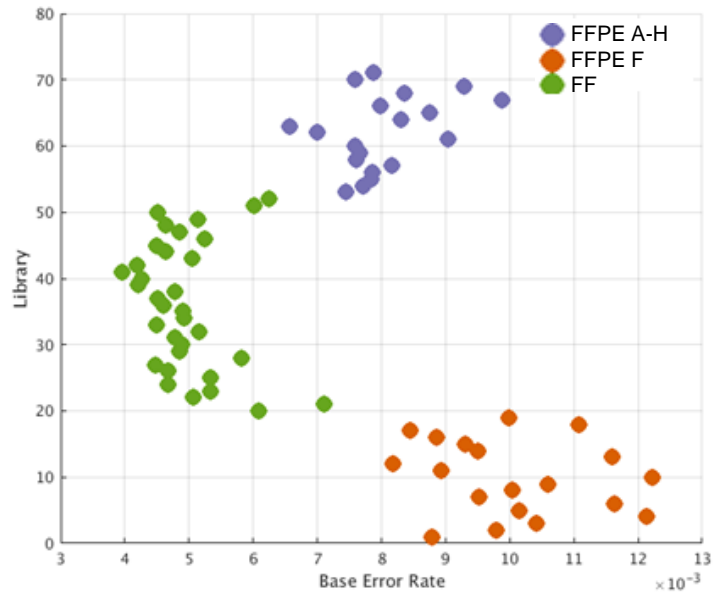**B.**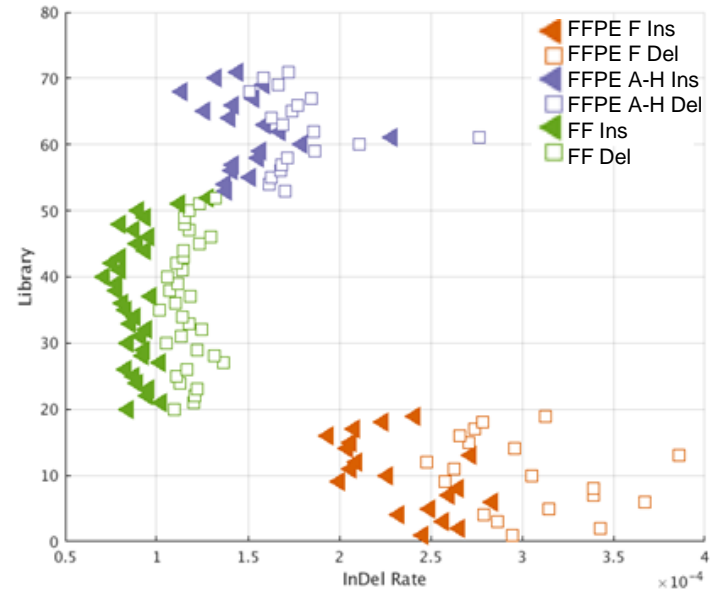

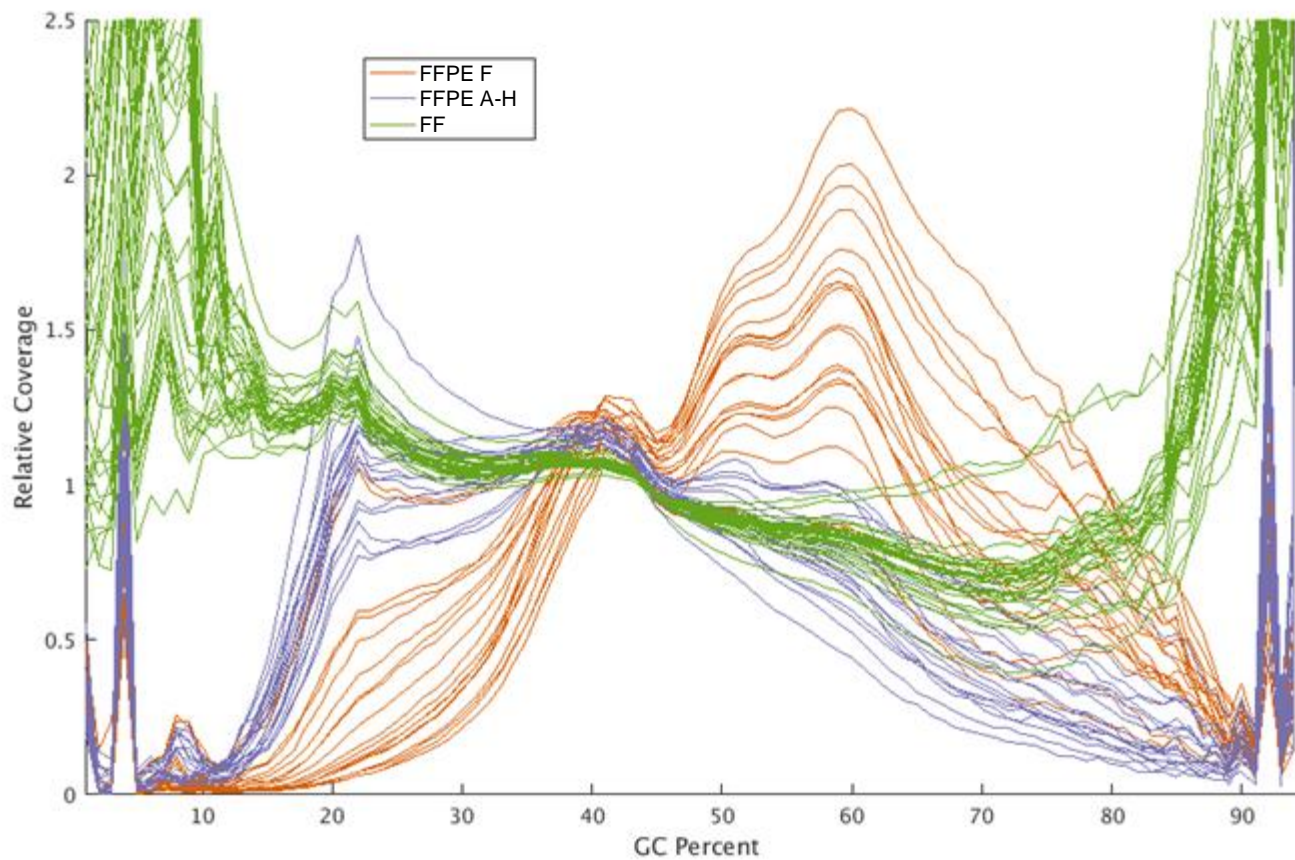

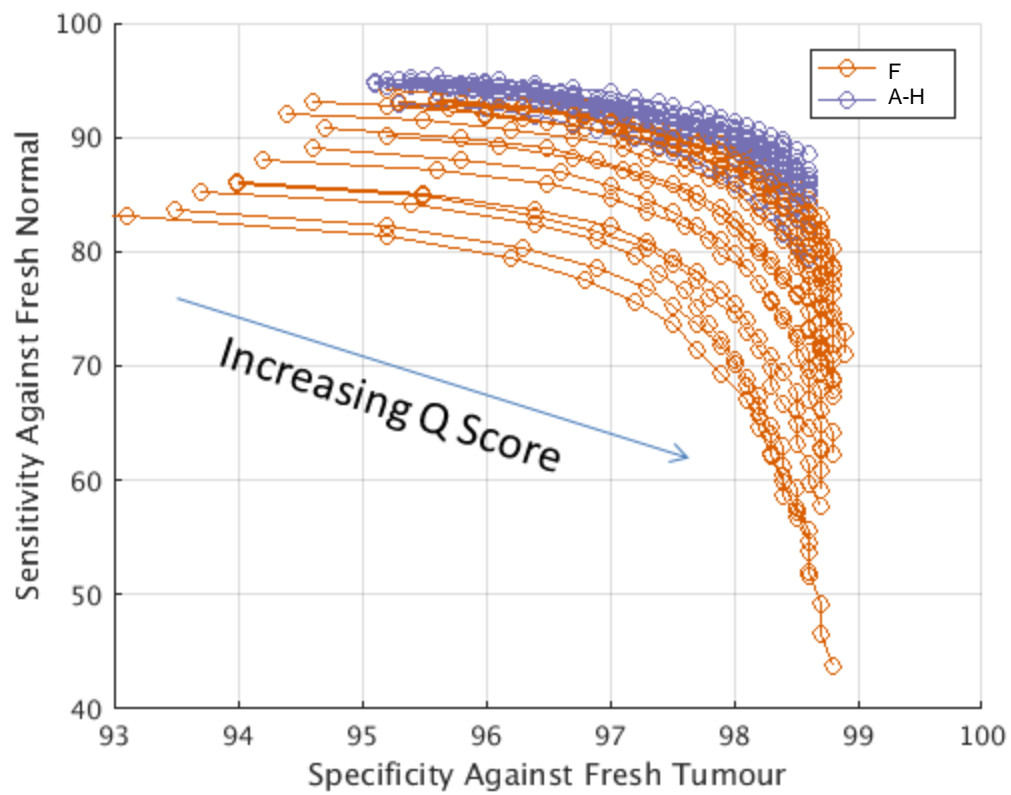

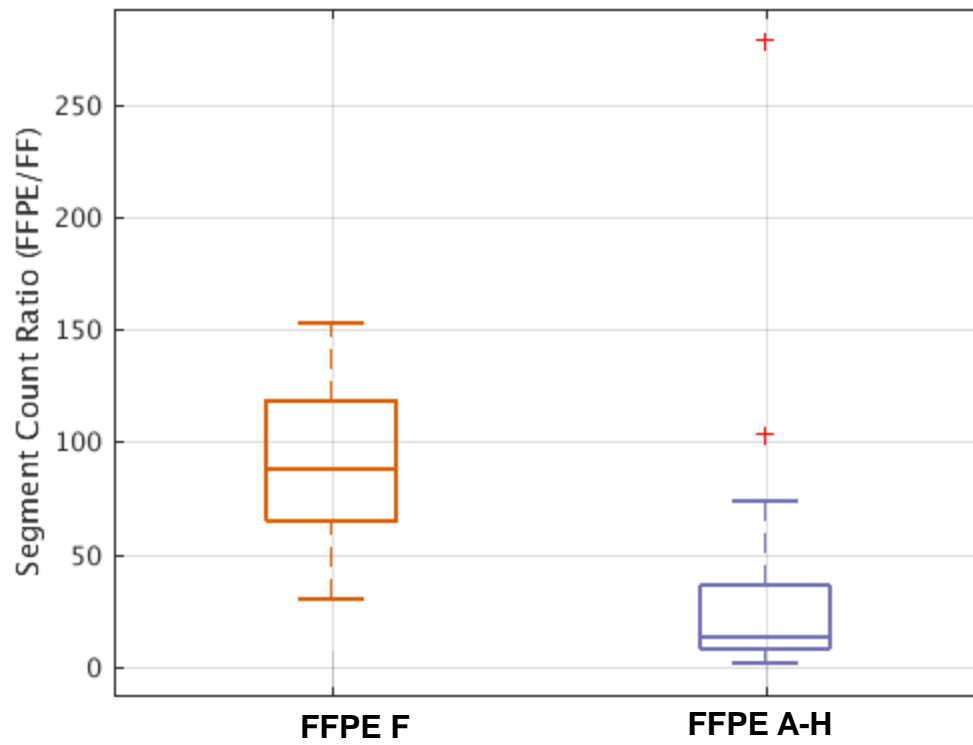

| Step                                                       | A-H                                        | Modified-FormaPure           |
|------------------------------------------------------------|--------------------------------------------|------------------------------|
| Deparaffinization                                          | Heptane; Methanol                          | Heat (2hr@70) °C             |
| Lysis buffer                                               | HiPure + SDS                               | Agencourt                    |
| Proteinase K<br>In respective lysis/special<br>buffer      | 45 min (RNA&DNA)<br>+60min (DNA)<br>@56° C | Overnight(RNA&DNA)<br>@55° C |
| Reverse crosslink<br>In respective lysis/special<br>buffer | 2hr@90° C                                  | 2hr@90° C                    |
| Nucleic acid purification                                  | Column                                     | Magnetic beads               |
| Retention of <75 bp DNA<br>fragments                       | No                                         | Yes                          |
| RNA and DNA<br>partitioning?                               | Yes                                        | No                           |

**Supplementary Figure 8**

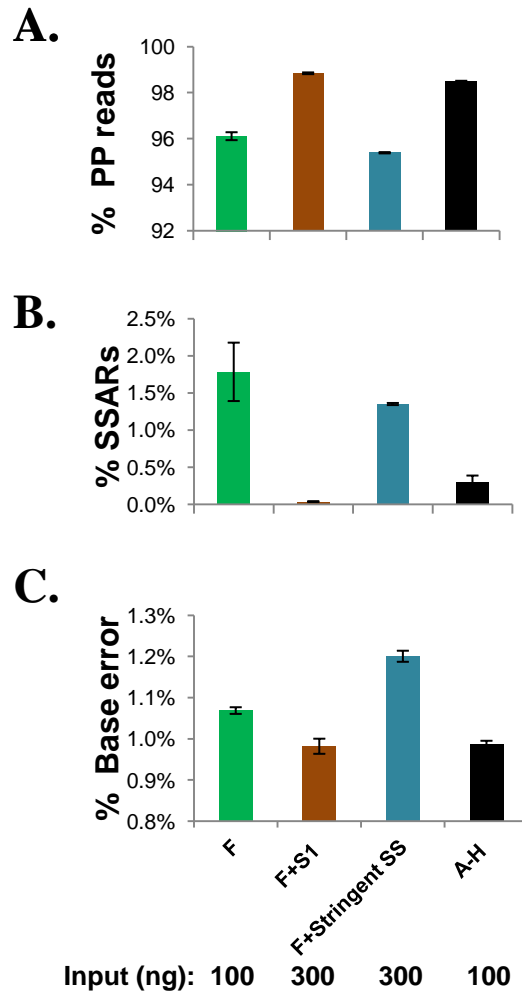

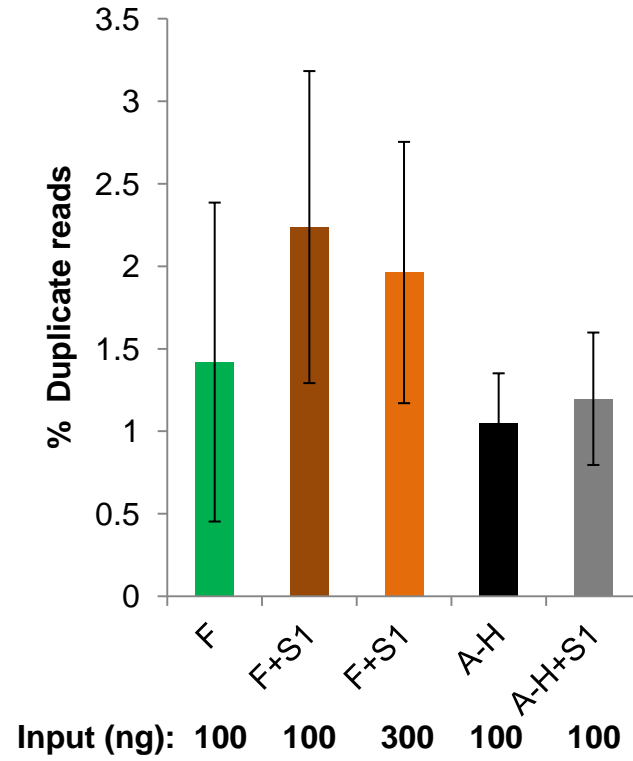



|                                        | Fresh Tumour | Fresh normal | FFPE F    | FFPE F+S1 |
|----------------------------------------|--------------|--------------|-----------|-----------|
| Sequenced on:                          | HiSeq 2500   | HiSeq 2500   | HiSeq X   | HiSeq X   |
| # Reads                                | 613405720    | 1243367554   | 943013536 | 977846050 |
| % chastity failed                      | 8.458        | 9.67         | 0         | 0         |
| Coverage of genome                     | 95.54        | 48.19        | 54.83     | 33.37     |
| %aligned                               | 99.668       | 99.622       | 99.854    | 99.891    |
| % PP reads                             | 98.39        | 98.287       | 89.683    | 98.019    |
| % uniquely aligned                     | 94.884       | 94.732       | 86.683    | 93.147    |
| Mean Insert Size                       | 418          | 438          | 157       | 181       |
| X coverage estimate                    | 23.612928    | 48.198601    | 31.505802 | 33.374752 |
| read length                            | 125          | 125          | 157       | 150       |
| general error rate                     | 0.008        | 0.0081       | 0.0132    | 0.0059    |
| mapped reads with insertion percentage | 1.25         | 1.22         | 2.2       | 1.27      |
| mapped reads with deletion percentage  | 1.51         | 1.47         | 2.71      | 1.51      |
| % stand-split artifact reads           | 0.           | 0            | 6.4       | 0.5       |

**Supplementary Figure 11**

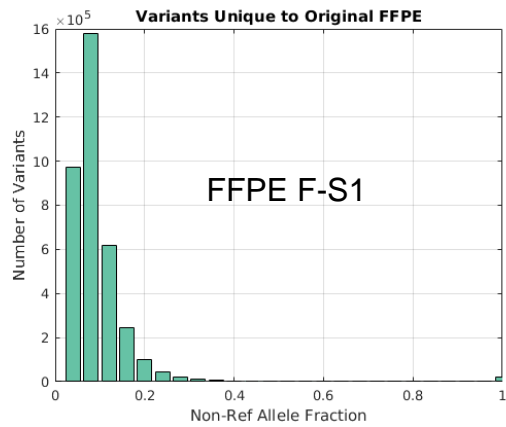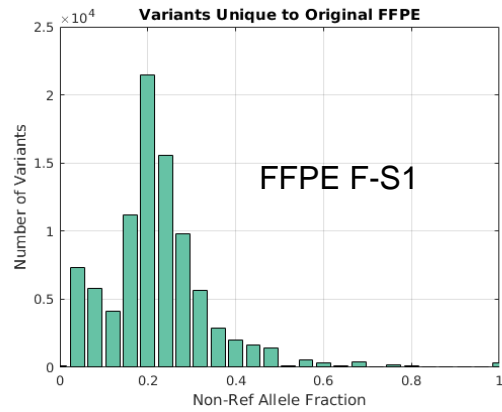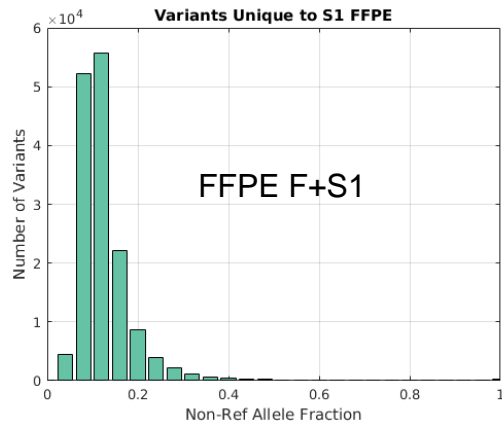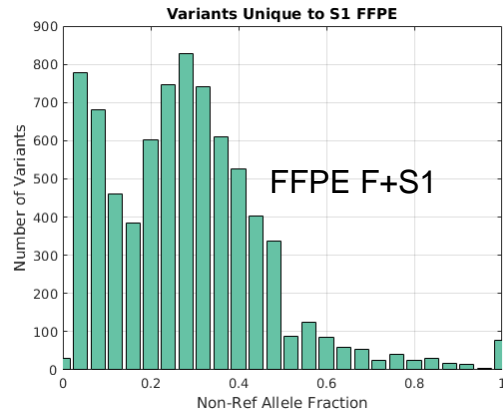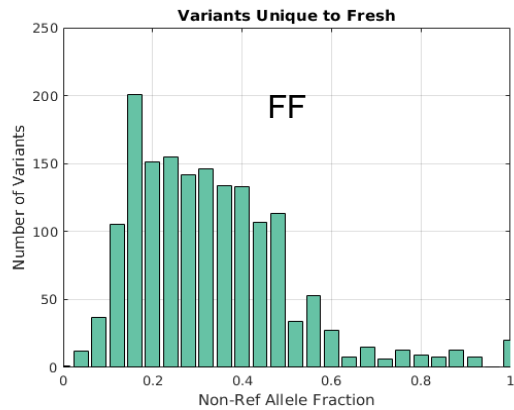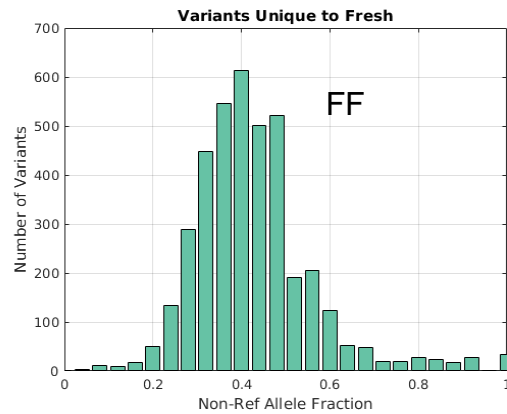

QSS score  $\geq 15$

QSS score  $\geq 35$

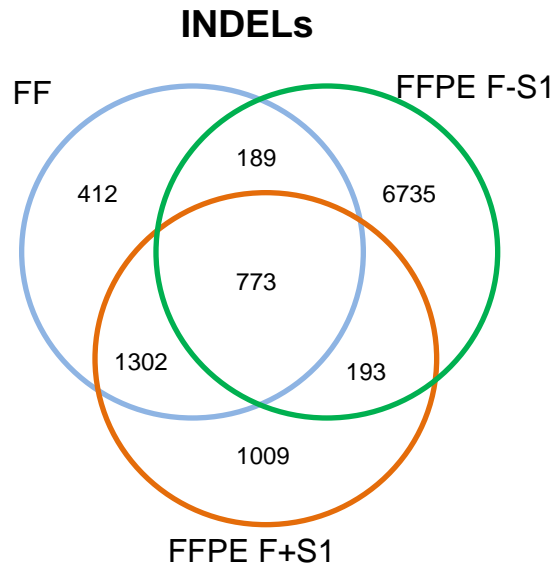

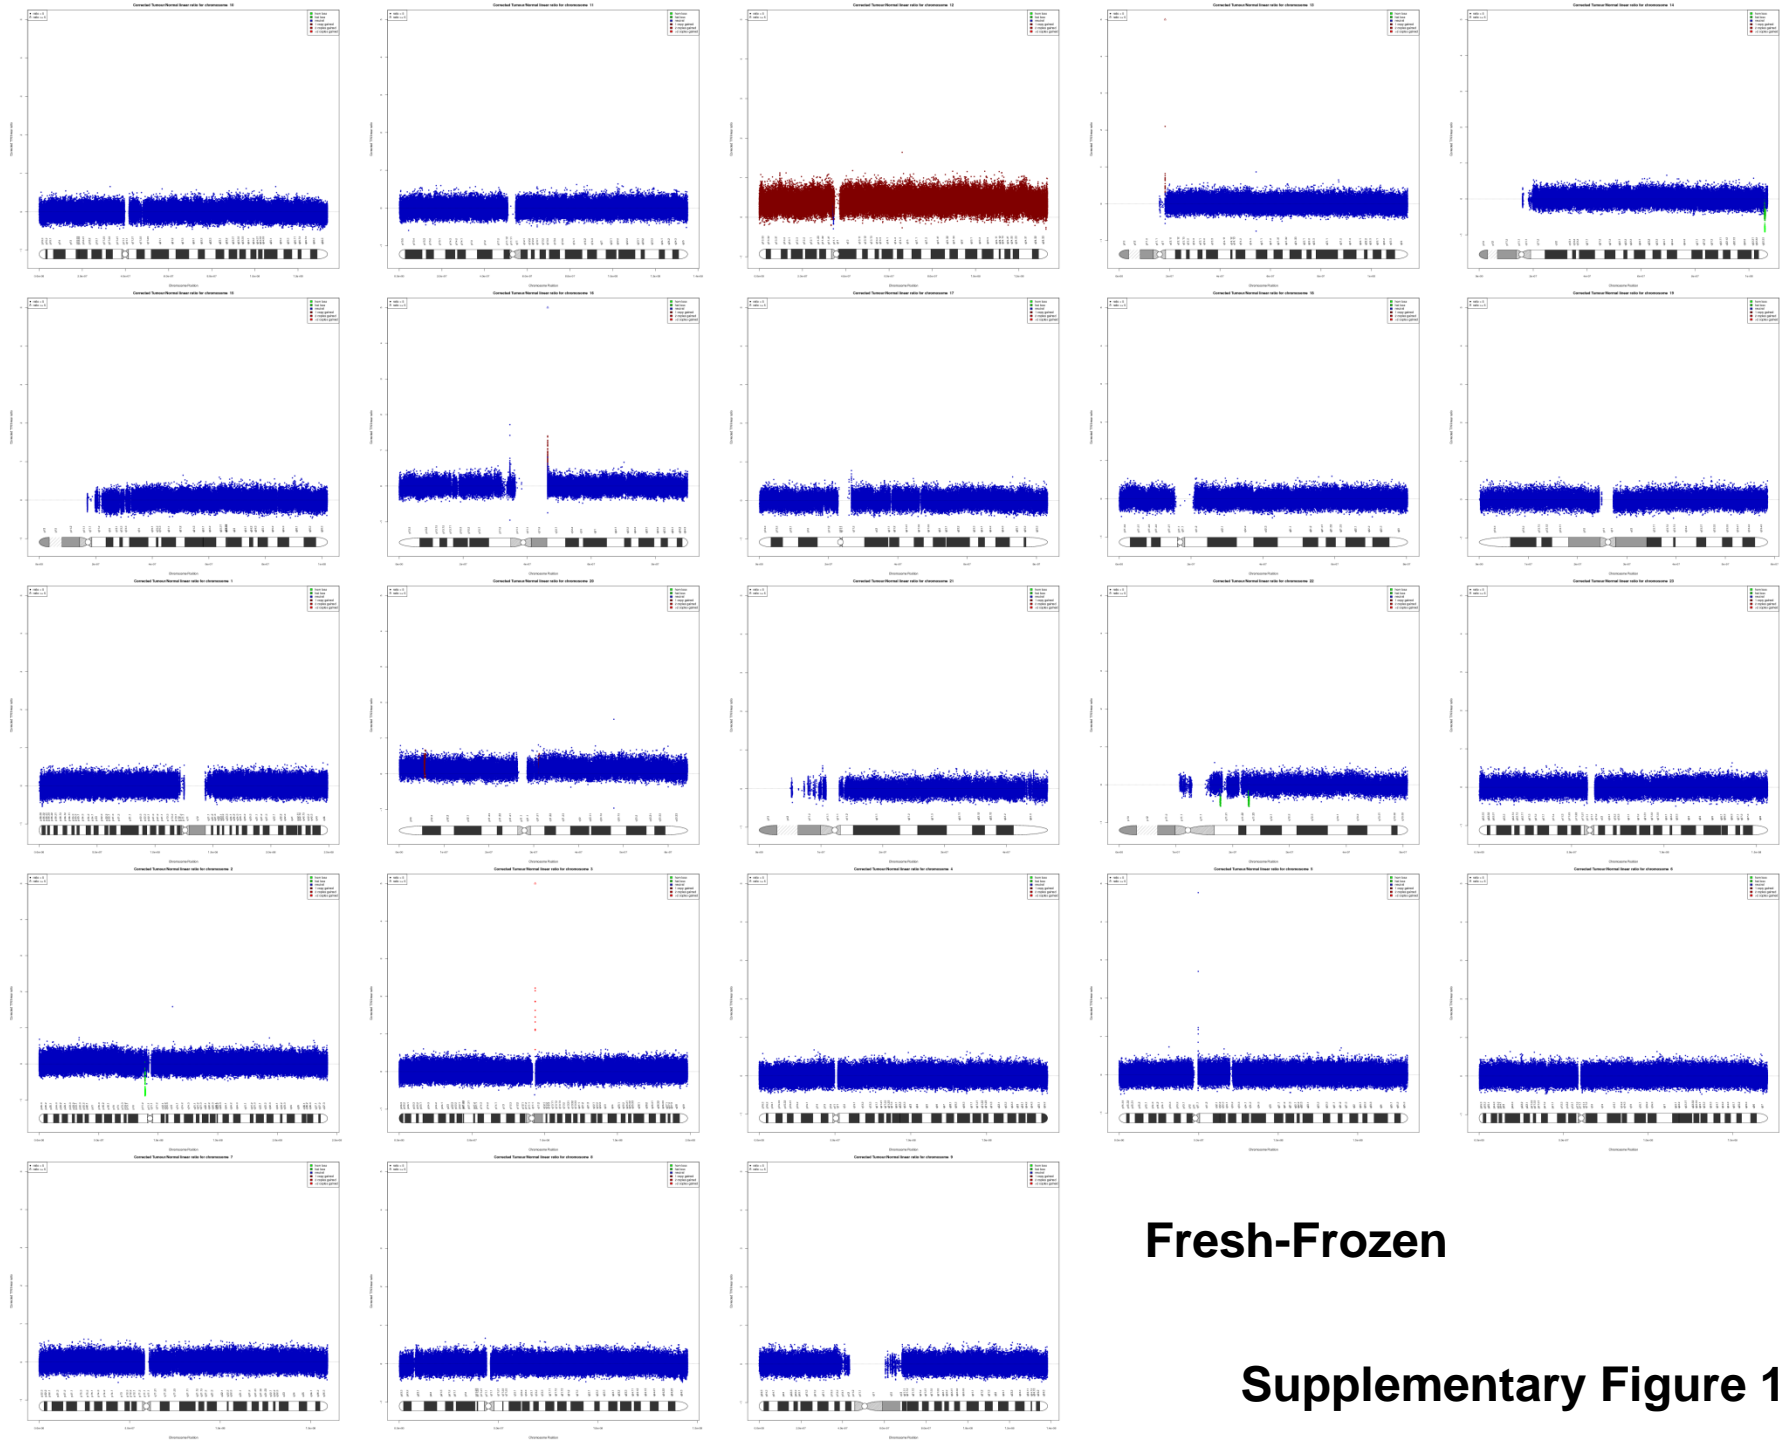

**Fresh-Frozen**

**Supplementary Figure 14**

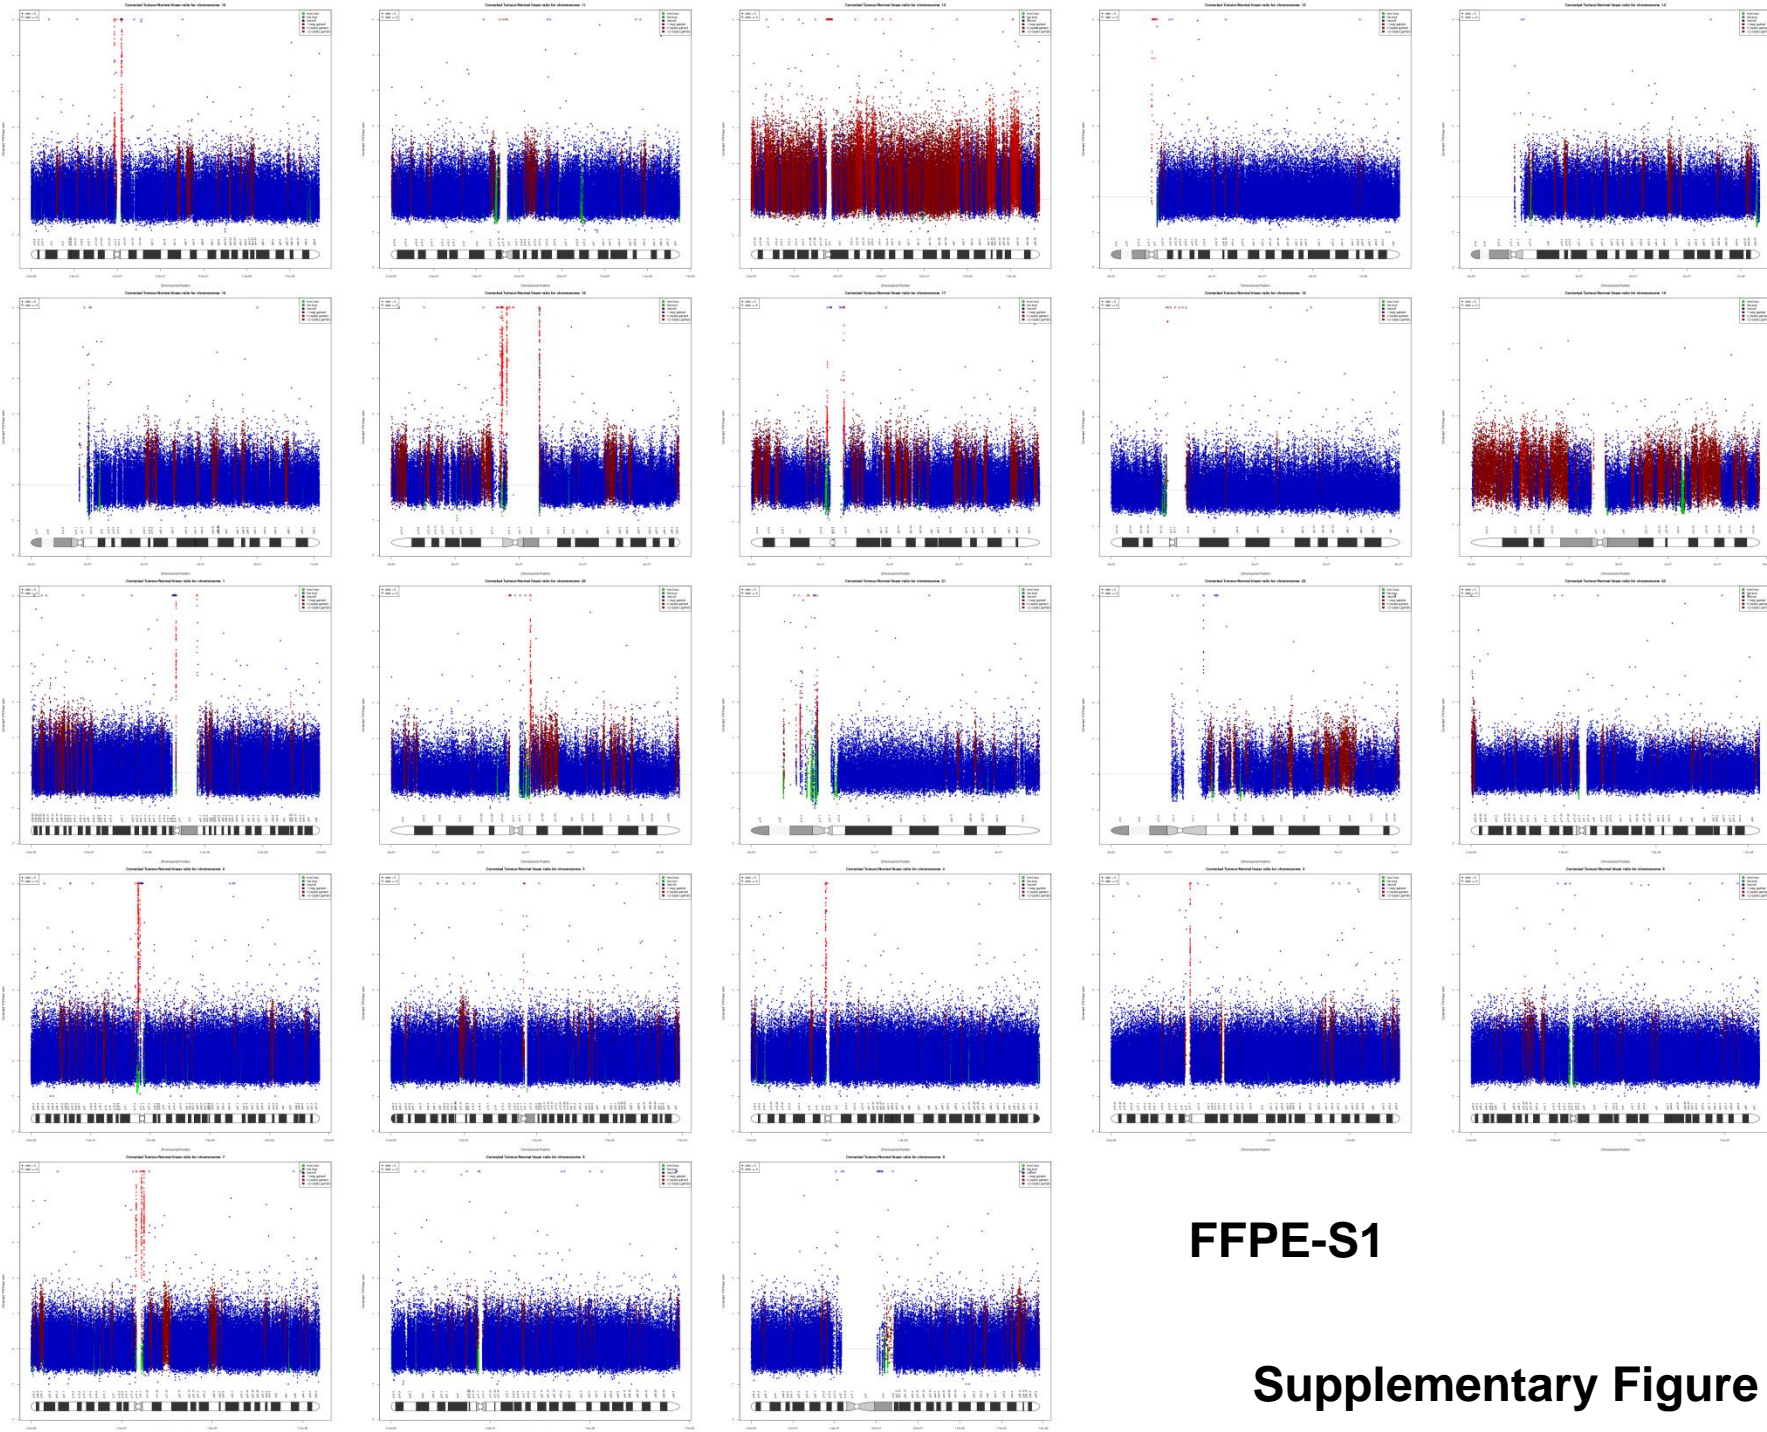

**FFPE-S1**

**Supplementary Figure 15**

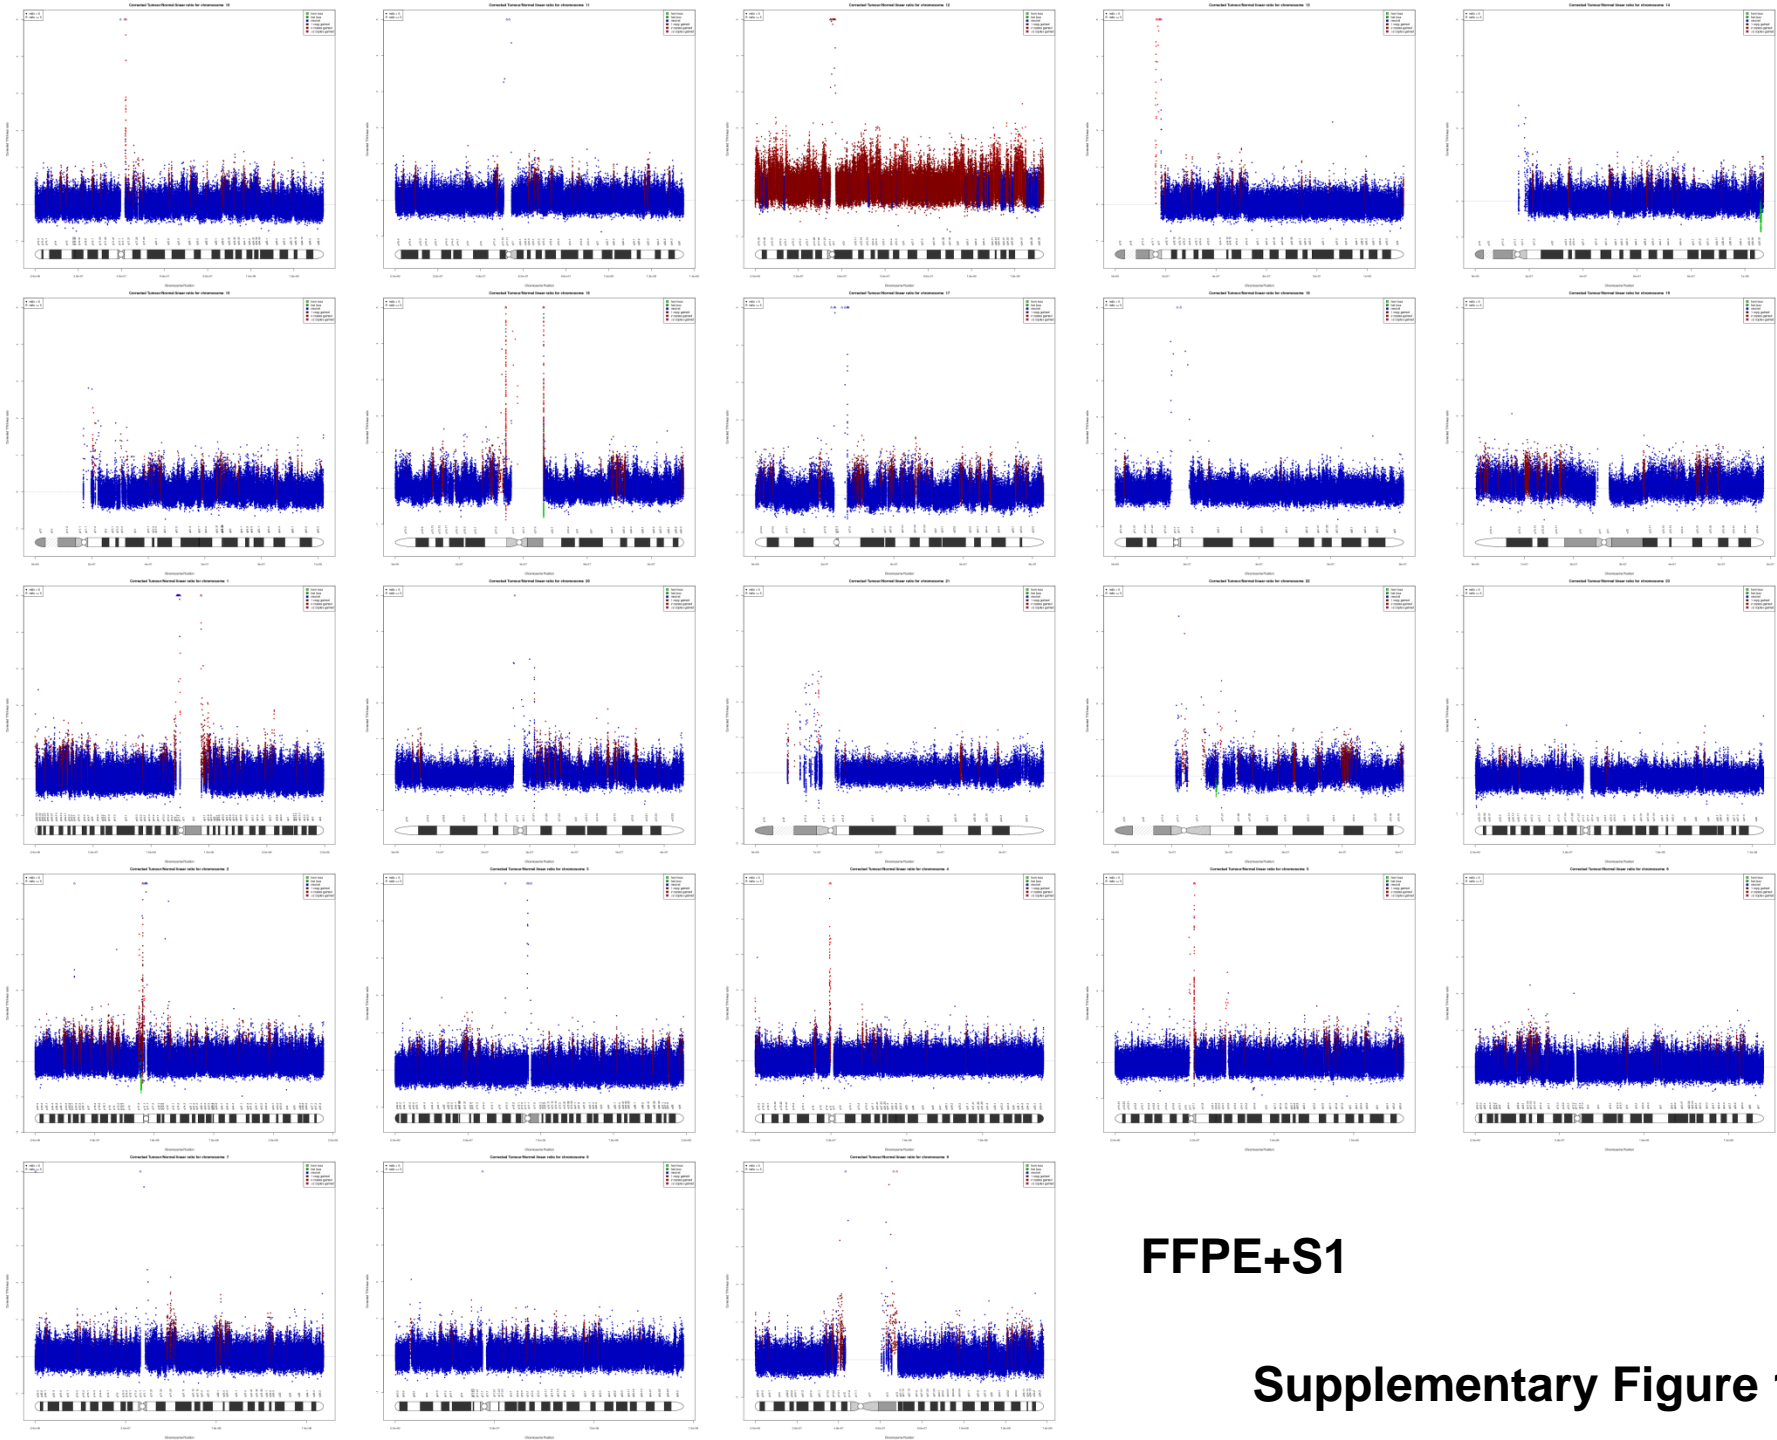

**FFPE+S1**

**Supplementary Figure 16**

|                                 | FFPE A-H Range (n=15)        | FFPE F+S1 nuclease |
|---------------------------------|------------------------------|--------------------|
| # Reads                         | 1652- 2005 million           | 978 million        |
| Coverage of genome              | 74.1-90.0                    | 33.37              |
| Mean insert (bp)                | 200-260                      | 181                |
| % PP reads                      | 92-98                        | 98                 |
| % SSAR                          | 0.7-2                        | 0.5                |
| GC bias                         | S1 slightly better at low GC |                    |
| % General Base Error Rate       | 0.7-1.0                      | 0.6                |
| CNV # segments (#FFPE/#Fresh)   | 10-40                        | 35.8               |
| % Somatic SNVs unique to FFPE   | 88-99.9                      | 87.9               |
| % Somatic Indels unique to FFPE | 24-60                        | 36.7               |

**Supplementary Figure 17**
